# Supplementary material for: Challenges in aptamer-based sensor development using carbon nanotube networks
Source: Royal Society of Chemistry journal article supplement (doi:10.1039/d4sd00250d), 2024-01-01
Supplement: d4sd00250d1.pdf [file d4sd00250d1.pdf]

## Supplementary Information of “Challenges in Aptamer-Based Sensor Development Using Carbon Nanotube Networks”

Laura Ferrer Pascual,<sup>a</sup> Eero Gustafsson<sup>a</sup>, Juha Siitonen<sup>b</sup>, Vasuki Durairaj<sup>c</sup> and Tomi Laurila<sup>\*a,b</sup>

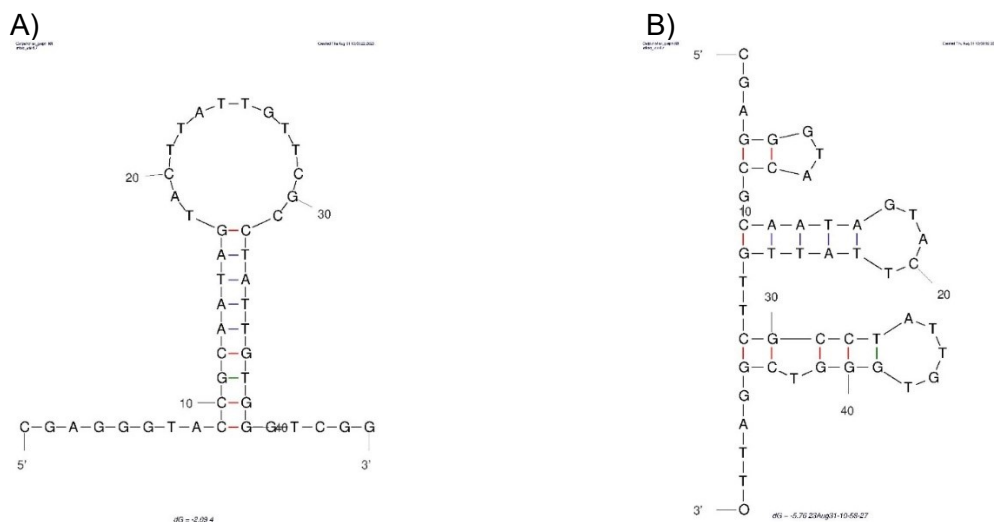

**Figure S11.** Scheme of the two possible aptamer structures obtained with M-fold.

### EDC/NHS ratio and concentration optimization

**Table S11.** Peak shift at 160Hz of three electrodes activated with different ratios and concentrations of EDC/NHS.

| Ratio | [EDC]<br>(M) | [NHS]<br>(M) | Peak shift (mV) at 160Hz |        |        |
|-------|--------------|--------------|--------------------------|--------|--------|
|       |              |              | BG-VA                    | BGA-VA | BG-BGA |
| 1:1   | 0.005        | 0.005        | -3.1                     | -9.1   | 6.0    |
| 1:2   | 0.1          | 0.2          | -6.0                     | -6.0   | 0.0    |
| 4:1   | 0.2          | 0.05         | -3.1                     | -9.1   | 6.0    |

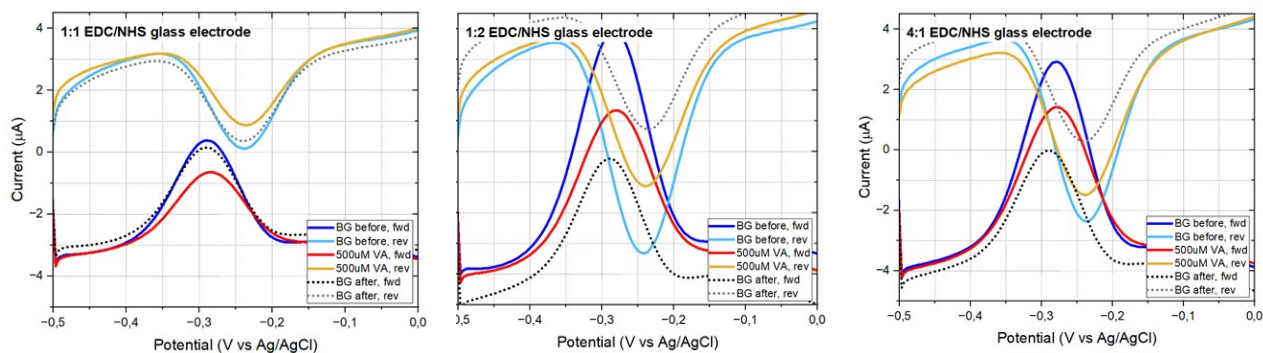

**Figure SI2.** SWVs of three electrodes with different ratios and concentrations of EDC/NHS.

### Optimal frequency study

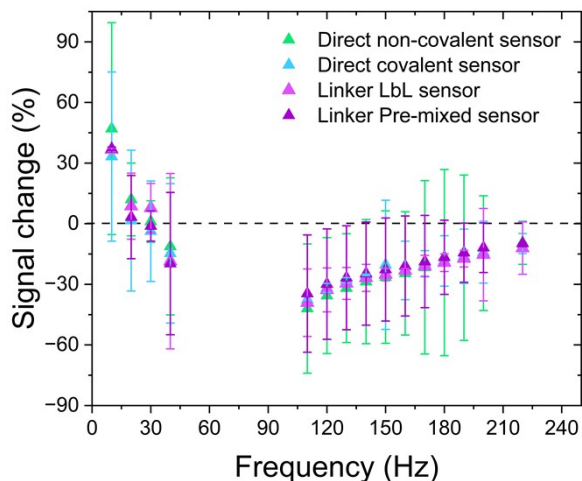

**Figure SI3.** Comparison of the signal change at different frequencies for the four studied EAB sensors.

**Table SI2.** Forward peak current, signal change, and signal loss values extracted from the potential-corrected SWVs at 40 and 160 Hz. (VA=vancomycin, BG=PBS before VA measurement, BGA=PBS after VA measurement).

|                    | Sensor # | 160 Hz                          |                |                |                             |                             | 40 Hz                           |                 |                 |                             |                             |
|--------------------|----------|---------------------------------|----------------|----------------|-----------------------------|-----------------------------|---------------------------------|-----------------|-----------------|-----------------------------|-----------------------------|
|                    |          | Forward peak current ( $\mu$ A) |                |                | Signal                      | Signal                      | Forward peak current ( $\mu$ A) |                 |                 | Signal                      | Signal                      |
|                    |          | BG                              | VA             | BGA            | change                      | loss                        | BG                              | VA              | BGA             | change                      | loss                        |
| Direct noncovalent | 1        | 26.78                           | 19.27          | 22.80          | 28%                         | 15%                         | 0.523                           | 0.495           | 0.462           | 5%                          | 12%                         |
|                    | 2        | 32.01                           | 24.15          | 28.48          | 25%                         | 11%                         | 0.846                           | 0.697           | 0.721           | 18%                         | 15%                         |
|                    | 3        | 22.89                           | 18.19          | 18.79          | 21%                         | 18%                         | 0.473                           | 0.443           | 0.429           | 6%                          | 9%                          |
|                    | Mean     | 27.2 $\pm$ 3.7                  | 20.5 $\pm$ 2.6 | 23.0 $\pm$ 4.1 | <b>25<math>\pm</math>3%</b> | <b>15<math>\pm</math>3%</b> | 0.61 $\pm$ 0.17                 | 0.55 $\pm$ 0.11 | 0.54 $\pm$ 0.13 | <b>10<math>\pm</math>6%</b> | <b>12<math>\pm</math>2%</b> |
| Direct covalent    | 1        | 27.26                           | 20.28          | 23.62          | 26%                         | 13%                         | 0.485                           | 0.467           | 0.418           | 4%                          | 14%                         |
|                    | 2        | 27.98                           | 23.20          | 26.12          | 17%                         | 7%                          | 0.742                           | 0.607           | 0.634           | 18%                         | 14%                         |
|                    | 3        | 22.22                           | 16.05          | 18.75          | 28%                         | 16%                         | 0.555                           | 0.447           | 0.450           | 19%                         | 19%                         |
|                    | Mean     | 25.8 $\pm$ 2.6                  | 19.8 $\pm$ 2.9 | 22.8 $\pm$ 3.1 | <b>24<math>\pm</math>5%</b> | <b>12<math>\pm</math>4%</b> | 0.59 $\pm$ 0.11                 | 0.51 $\pm$ 0.07 | 0.50 $\pm$ 0.10 | <b>14<math>\pm</math>7%</b> | <b>16<math>\pm</math>2%</b> |
| Linker LbL         | 1        | 27.17                           | 18.78          | 22.74          | 31%                         | 16%                         | 0.434                           | 0.395           | 0.374           | 9%                          | 14%                         |
|                    | 2        | 37.90                           | 31.11          | 33.73          | 18%                         | 11%                         | 0.927                           | 0.672           | 0.763           | 28%                         | 18%                         |
|                    | 3        | 25.03                           | 19.37          | 22.63          | 23%                         | 10%                         | 0.647                           | 0.570           | 0.574           | 12%                         | 11%                         |
|                    | Mean     | 30.0 $\pm$ 5.6                  | 23.1 $\pm$ 5.7 | 26.4 $\pm$ 5.2 | <b>24<math>\pm</math>5%</b> | <b>12<math>\pm</math>3%</b> | 0.67 $\pm$ 0.20                 | 0.55 $\pm$ 0.11 | 0.57 $\pm$ 0.16 | <b>16<math>\pm</math>8%</b> | <b>14<math>\pm</math>3%</b> |
| Linker Premix      | 1        | 30.52                           | 23.70          | 27.47          | 22%                         | 10%                         | 0.570                           | 0.469           | 0.474           | 18%                         | 17%                         |
|                    | 2        | 31.96                           | 25.37          | 29.01          | 21%                         | 9%                          | 0.969                           | 0.736           | 0.820           | 24%                         | 15%                         |
|                    | 3        | 19.28                           | 15.60          | 17.80          | 19%                         | 8%                          | 0.582                           | 0.497           | 0.524           | 15%                         | 10%                         |
|                    | Mean     | 27.3 $\pm$ 5.7                  | 21.6 $\pm$ 4.3 | 24.8 $\pm$ 5.0 | <b>21<math>\pm</math>1%</b> | <b>9<math>\pm</math>1%</b>  | 0.71 $\pm$ 0.19                 | 0.57 $\pm$ 0.12 | 0.61 $\pm$ 0.15 | <b>19<math>\pm</math>4%</b> | <b>14<math>\pm</math>3%</b> |

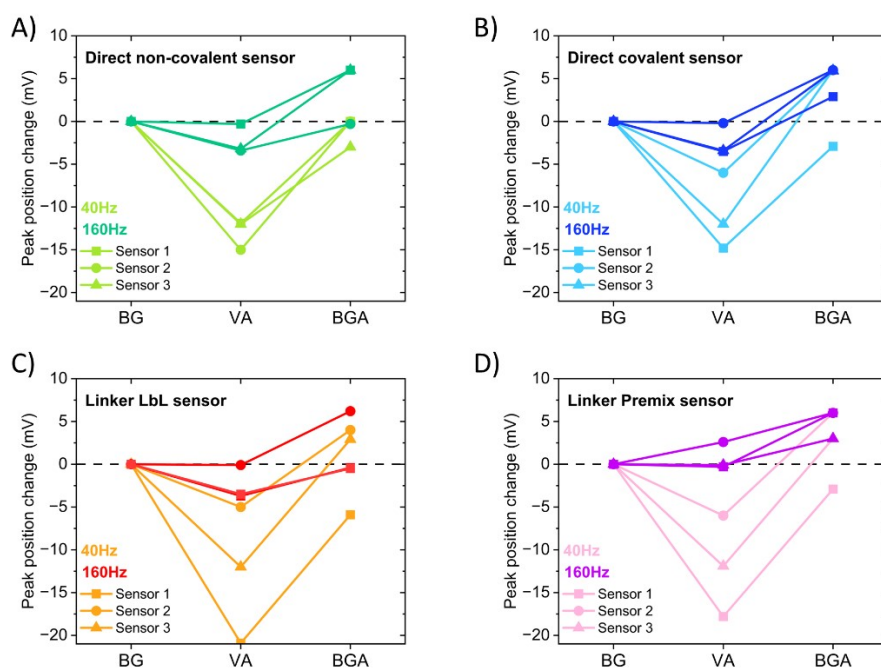

**Figure SI4.** Peak shifts of the forward partial currents at 40 and 160Hz of the four aptamer immobilization approaches. Three sensors were measured for each aptamer immobilization approach. (VA=vancomycin, BG=PBS before VA measurement, BGA=PBS after VA measurement).

### Stability and repeatability study

**Table SI3.** Signal loss after each measurement of saturating concentration of vancomycin for Direct non-covalent and Linker LbL sensors prepared with different cleaning methods. The total signal loss after the three vancomycin measurements is also presented.

|                                            | Signal loss %               |          |                |          |                    |           |                |          |
|--------------------------------------------|-----------------------------|----------|----------------|----------|--------------------|-----------|----------------|----------|
|                                            | Direct non-covalent sensors |          |                |          | Linker LbL sensors |           |                |          |
|                                            | No cleaning                 |          | GuHCl cleaning |          | VA bath cleaning   |           | GuHCl cleaning |          |
|                                            | 40 Hz                       | 2000 Hz  | 40 Hz          | 2000 Hz  | 40 Hz              | 2000 Hz   | 40 Hz          | 2000 Hz  |
| <b>After 1<sup>st</sup> VA measurement</b> | 24.5±5.6                    | 14.8±3.6 | 11.8±2.9       | 10.1±1.9 | 6.3±13.8           | 8.2±2.2   | 15.7±3.2       | 8.2±1.9  |
| <b>After 2<sup>nd</sup> VA measurement</b> | 6.5±1.5                     | 5.2±1.1  | 2.9±0.3        | 2.7±1.0  | 15.5±6.8           | 11.2±5.6  | 1.4±2.7        | 3.5±2.2  |
| <b>After 3<sup>rd</sup> VA measurement</b> | 8.0±5.9                     | 7.1±5.0  | 4.1±1.0        | 2.6±1.2  | 10.3±6.4           | 7.2±5.7   | 6.0±3.9        | 2.8±3.2  |
| <b>Total loss</b>                          | 34.7±9.5                    | 24.8±7.3 | 19.2±4.1       | 27.3±1.9 | 29.5±9.5           | 24.1±10.0 | 21.7±6.9       | 13.8±5.9 |

## Basic electrochemistry of plain SWCNT

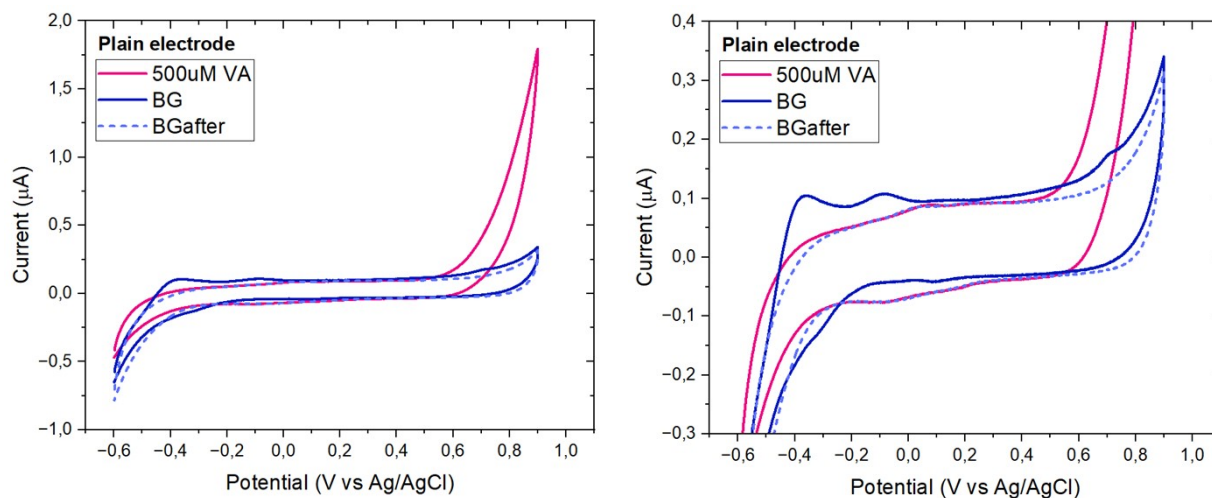

**Figure S15.** Cyclic Voltammetry of a plain electrode in PBS before (BG) and after (BGafter) the measurement of 500uM VA.

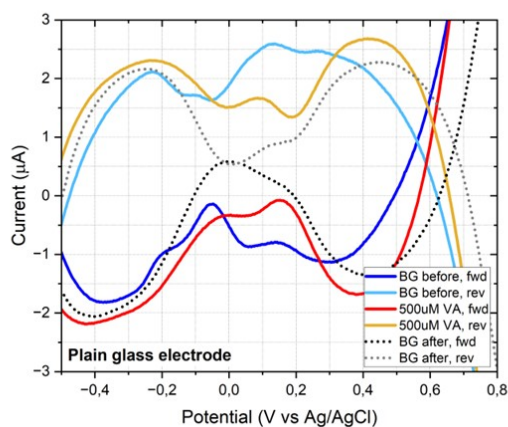

**Figure S16.** SWV of a plain electrode in PBS before (BG) and after (BGafter) the measurement of 500uM VA.

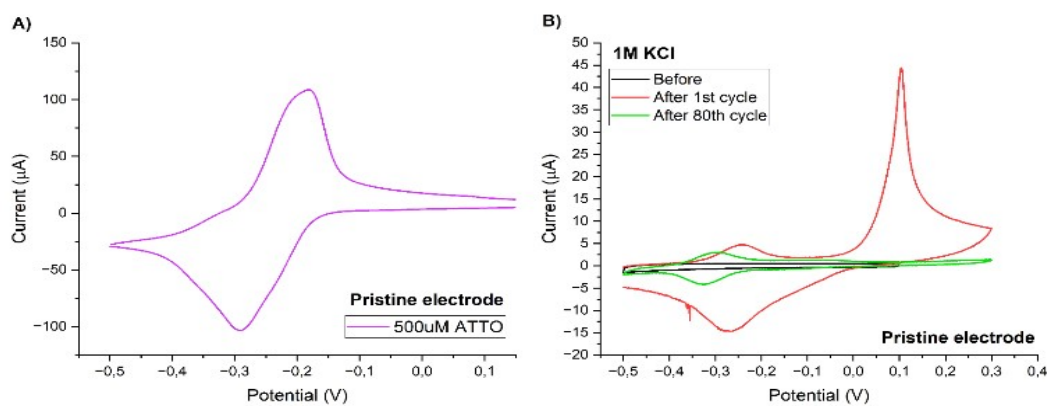

**Figure S17.** CV at 1V/s of a plain electrode in A) 500uM ATTO-MB2 and B) 1M KCl before and after the ATTO-MB2 measurement.

## Concentration series

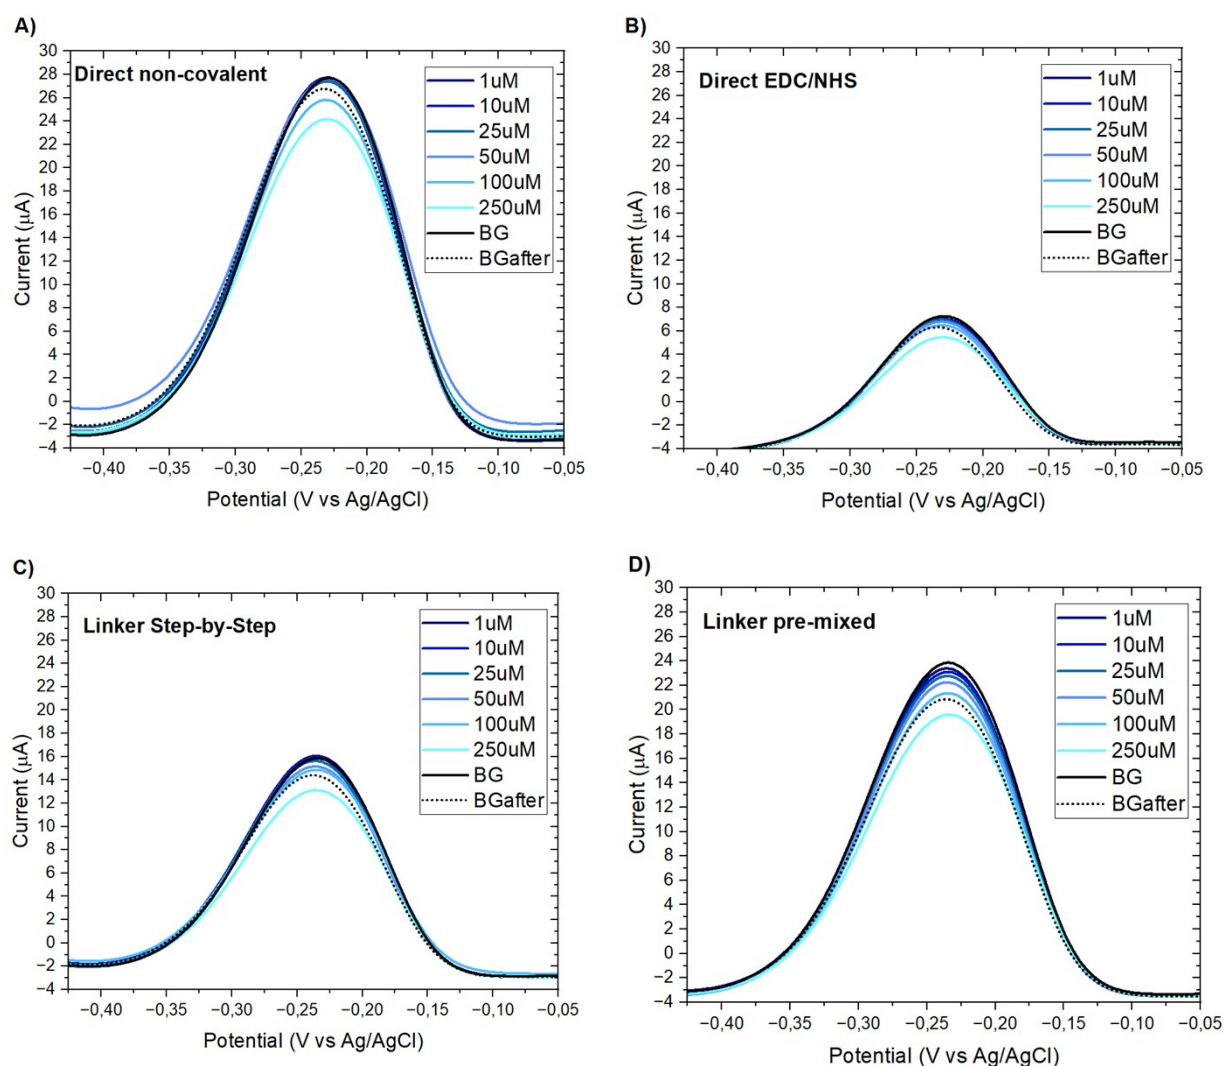

**Figure S18.** Potential-corrected forward SWVs at 160Hz of 1, 10, 25, 50, 100, and 250µM VA solutions of A) Direct non-covalent, B) Direct EDC/NHS, C) Linker step-by-step, and D) Linker pre-mixed electrodes.

**Table S14.** Shift in the position of the oxidation peak due to vancomycin of the four different sensors.

| Sample #   | PEAK SHIFT (mV)     |      |      |                |      |      |      |                     |     |      |                  |      |      |
|------------|---------------------|------|------|----------------|------|------|------|---------------------|-----|------|------------------|------|------|
|            | Direct non-covalent |      |      | Direct EDC/NHS |      |      |      | Linker Step-by-step |     |      | Linker Pre-mixed |      |      |
|            | 1                   | 2    | 3    | 1              | 2    | 3    | 4    | 1                   | 2   | 3    | 1                | 2    | 3    |
| BG-BGafter | 2.9                 | 3    | 2.7  | 6              | 2.9  | 2.8  | 2.7  | 2.9                 | 4.5 | -0.2 | 0.1              | 1.5  | 1.7  |
| BG-1µM     | -0.2                | 0    | 3.1  | 3.1            | 0    | 0    | -0.2 | 0                   | 3   | -2.1 | 0                | -1.5 | 0    |
| BG-10µM    | 3.2                 | -0.2 | 3.1  | 3              | 0    | -0.1 | -0.3 | 3.2                 | 3   | -0.1 | 0                | -1.6 | -0.2 |
| BG-25µM    | -0.3                | -0.2 | 3    | 3              | -0.1 | -0.1 | 2.9  | -0.1                | 2.9 | -0.2 | 0                | -1.7 | -0.1 |
| BG-50µM    | -0.3                | 3.1  | 2.9  | 3              | -0.1 | -0.1 | 2.8  | -0.1                | 2.8 | -0.2 | -0.2             | -0.9 | 1.7  |
| BG-100µM   | 1.3                 | -0.3 | -0.7 | 2.9            | -0.1 | -0.2 | 2.8  | -0.1                | 2.8 | -0.2 | -0.2             | -1.8 | 1.7  |
| BG-250µM   | 2.9                 | -0.3 | 2.6  | 2.9            | -0.3 | -0.2 | -0.5 | 3.1                 | 1.2 | -3.3 | -0.1             | -1.8 | -0.2 |
